1                   **Phenology and flowering overlap drive specialization in pollinator networks**

2  
3  
4  
5           Paul Glaum†\* 1,2 & Thomas J. Wood†\* 3, Jonathan R. Morris 4 & Fernanda S. Valdovinos 1,2  
6  
7  
8

- 9   1. Dept. of Environmental Science & Policy, University of California-Davis, Davis, CA 95616  
10  2. Dept. of Ecology & Evolutionary Biology, University of Michigan, Ann Arbor, MI 48109  
11  3. Laboratory of Zoology, University of Mons, Mons, 7000, Belgium  
12  4. School for Environment and Sustainability, University of Michigan, Ann Arbor, MI 48109  
13

14 \* These authors contributed equally to this work and are listed alphabetically.

15  
16 †Materials and Correspondence to:

17 Paul Glaum – [prglaum@ucdavis.edu](mailto:prglaum@ucdavis.edu)

18 Thomas J. Wood – [thomasjames.wood@umons.ac.be](mailto:thomasjames.wood@umons.ac.be)  
19  
20  
21  
22  
23  
24  
25  
26  
27  
28  
29  
30  
31  
32  
33  
34  
35  
36  
37  
38  
39  
40  
41  
42  
43  
44  
45  
46  
47

48 Classification: Article

49 Keywords: diet breadth, specialization, phenology, temporal resource density, pollination networks,  
50 pollen, seasonality, adaptive foraging  
51

52           **Variation in diet breadth and specialization stems from fundamental interactions species**  
53 **have with their environment<sup>1-3</sup>. Consequently, understanding the drivers of this variation is key to**  
54 **understanding ecological and evolutionary processes, and will facilitate the development of**  
55 **predictive tools as ecological networks respond to environmental change<sup>4,5</sup>. Diet breadth in wild**  
56 **bees has been an area of focus due to both their close mutualistic dependence on plants, and**  
57 **because both groups are under threat from global biodiversity loss<sup>6</sup>. Though many of the principles**  
58 **governing specialization for pollinators have been identified<sup>7,8</sup>, they remain largely unvalidated.**  
59 **Using mechanistic models of adaptive foraging in pollinators<sup>9,10</sup>, we show that while temporal**  
60 **resource overlap has little impact on specialization in pollinators with extended flight periods,**  
61 **reduced overlap increases specialization as pollinator flight periods decrease. These results are**  
62 **corroborated empirically using pollen load data taken from bees with shorter (genus *Andrena*) and**  
63 **longer (genus *Lasioglossum*) flight periods across environments with both high and low temporal**  
64 **resource overlap. This approach reveals how interacting phenologies structure plant-pollinator**  
65 **networks and drive pollinator diet breadth via the temporal overlap of floral resources.**

66           The dietary specialization of an organism sits at the nexus of numerous fundamental processes in  
67 ecology and evolutionary biology. Diet breadth helps define organismal niches<sup>1</sup>, mediates migration and  
68 dispersal potential<sup>2,11</sup>, shapes inter- and intraspecific competition<sup>3,12</sup>, influences species persistence in the  
69 face of environmental disturbance<sup>4</sup>, and can affect rates of speciation and extinction<sup>5</sup>. Even the simple  
70 assembly of the collection of dietary ranges of organisms in a community defines one of the major  
71 concepts in ecology, the food web. Therefore, identifying the drivers influencing diet breadth and  
72 specialization provides fundamental steps towards understanding a multitude of essential biological  
73 questions.

74           Much of the progress in understanding specialization in consumers comes from studies of  
75 herbivory<sup>1</sup>, particularly on insects<sup>13</sup>. Using wild bees and plant-pollinator networks as our study system,  
76 we extend the scope of those studies to include mutualistic interactions. A mutualism is a ubiquitous  
77 ecological interaction in which participant species benefit each other<sup>14</sup>, and pollination therefore differs

78 from other insect herbivory because of the reproductive benefit offered to both consumer and consumed  
79 species. Bees depend on removing pollen from flowers to rear their offspring, providing a pollination  
80 service at the same time<sup>15</sup>. Pollination is also of particular interest given its role in supporting terrestrial  
81 biodiversity<sup>6</sup> and agricultural output<sup>16</sup>, a role threatened by widespread declines in both pollinators and  
82 insect pollinated plants<sup>6,17</sup>.

83 Research on insect herbivores has largely focused on how adaptation to plant traits and defenses  
84 drives consumer concentration on single plant families<sup>18,19</sup>. However, other drivers of diet breadth have  
85 been identified (ref 7,8, see Table S1). Here, we expand on the fundamental effect of resource density on  
86 a consumer's diet breadth and specialization<sup>7</sup>, not in a spatial context, but temporally. This resource  
87 density is important in its interaction with consumer phenology. For long-lived organisms (e.g., predatory  
88 vertebrates), opportunities to access a single resource type principally depend on the resource's spatial  
89 distribution. If a single resource type is physically dense, then a predator can specialize on it without  
90 needing to turn to alternatives, whereas if it is patchily distributed then a strategy of specialization is less  
91 optimal. However, for a comparatively short-lived organism like a bee whose adult flight period can be  
92 measured in days, the distribution of a resource type in time is the principal determinant of accessibility.  
93 A plant species that blooms for 30 days is *de facto* dense, continuously available resource for a bee  
94 species whose flight period lasts for only 25 days, but sparse and patchily distributed for a species which  
95 flies for 90 days. The temporal pattern of flowering can therefore be considered the functional equivalent  
96 of resource density for short-lived organisms. These ideas have proven influential but require concrete  
97 theoretical and empirical validation to solidify their conclusions.

98 Expanding upon this idea of temporal density, we hypothesize that the degree of temporal overlap  
99 in the availability of different resources (flowering overlap among co-occurring plant species) in  
100 combination with the fundamental life history phenologies of bees (adult flight period) determines  
101 realized diet breadth. Applied to plant-pollinator systems, we hypothesize that reduced flowering overlap  
102 will reduce the diet breadth of short-lived but not of long-lived pollinators (Fig. 1). Shorter-lived  
103 pollinators will experience markedly different resource availability based on the degree of temporal

104 overlap of co-flowering species. High flowering overlap will allow shorter-lived pollinators a greater  
105 number of options while low overlap will restrict options. Longer-lived pollinators will be less constricted  
106 by the temporal overlap of co-occurring resources, often having equal number of options regardless of the  
107 degree of overlap (Fig. 1). Importantly, our hypothesis does not indicate that flight period will necessarily  
108 correspond with being more or less specialized. Instead, it describes how temporal resource overlap will  
109 affect diet breadth as a function of a pollinator's flight period.

110 We employed a multi-faceted approach to test our hypothesis. First, we leverage advances in  
111 modeling adaptive foraging in ecological networks<sup>9,10</sup> to directly address the phenological mechanism  
112 driving diet breadth across different pollinator flight periods. Second, we utilize our intercontinental  
113 pollen load dataset of shorter lived *Andrena* bees and longer lived *Lasioglossum* bees from both a highly  
114 seasonal and a less seasonal environment which function as low and high temporal resource overlap  
115 treatments, respectively, to empirically validate our model outputs.

116

## 117 **Results**

### 118 **Overview**

119 Plant-pollinator dynamics are modeled using a dynamic consumer-resource approach that  
120 incorporates adaptive foraging of pollinators to mechanistically model pollinators' consumption of floral  
121 rewards and reproductive services to plant species<sup>9,10</sup> (see Supplementary Methods Table S2). The  
122 model's adaptive foraging mechanism serves as a useful tool to implement and measure changing  
123 pollinator diet breadth (see Supplementary Methods). Phenology is integrated into the base model through  
124 modified sinusoidal wave functions which produce unique phenologies for every plant  $i$  ( $T_{p_i}$ ) and animal  
125 pollinator  $j$  ( $T_{a_j}$ ). These functions  $T_{p_i}$  and  $T_{a_i}$  regulate floral reward production, adaptive foraging rates,  
126 pollinator visitation rates, and consequently, plant and pollinator reproduction across time (Tables S3-S4).  
127 The malleability of our phenology functions facilitates direct control over the availability of specific  
128 resources and the activity patterns of the animal pollinators over time in simulations (see Supplementary

129 Methods, Fig S1-S5). The quantitative degree of overlap in co-occurring floral resources can be measured  
130 as the Total Resource Overlap (TRO) of the entire plant community, and the Averaged Resource Overlap  
131 (ARO) per plant species. Activity patterns of animal pollinators are set up to produce a range of different  
132 flight period lengths separated by differing lengths in between flight periods (Fig S6). Simulations use  
133 three fully connected bipartite network frameworks across 2072 combinations of plant and pollinator  
134 phenologies to produce 62160 unique networks used to model over 22 million plant-pollinator  
135 interactions (see Supplementary Methods).

136 Our pollen load data (see Supplementary Methods) comprises a large sample set of two bee  
137 genera, *Andrena* (Andrenidae) and *Lasioglossum* (Halictidae), collected both in the state of Michigan,  
138 USA (Nearctic) and the United Kingdom (Palearctic). Restricting our geographic scale to these two  
139 specific Holarctic locations aids in our ability to compare across both bee and plant communities due to  
140 their shared evolutionary history and overall similarity (see Supplementary Methods). The highly  
141 seasonal continental climate of Michigan<sup>20</sup> produces lower degrees of overlap and highly seasonal  
142 flowering communities, while the more mild oceanic climate of the British Isles<sup>20</sup> and its consistent  
143 temperatures produces longer, overlapping flowering times among plant species<sup>21</sup>.

144 Diet breadth or the degree of specialization in pollinators is measured both in-model with output  
145 on pollinator foraging effort and empirically with relative abundance of different pollen in bee pollen  
146 loads. We used two metrics that were applicable to both theoretical and empirical results for better direct  
147 comparisons, because simply counting unique taxonomic groups in the pollen data will not be applicable  
148 to theoretical results. We developed the first metric and labeled it Deviation from Generalism (DFG) (see  
149 Supplementary Methods, Table S5). Briefly, DFG is the normalized summation of all pairwise differences  
150 of pollinator foraging effort (or relative pollen load) on potential floral resources (see Supplementary  
151 Methods, Table S5). It ranges from 0 (perfect generalist) to 1 (perfect specialist). The second metric was  
152 the Coefficient of Variation (CV) of a pollinator's foraging effort (or pollen load). Higher CV values  
153 occur with outlying values indicating specialization. With model results, both DFG and CV were applied

154 to final foraging levels at the end of simulations as well as the average foraging levels across the last 1000  
155 time steps (see Supplementary Methods, Fig S7).

## 156 **Model Results**

157 Our simulation results (Figs. 2, 3) support our hypothesis (Fig. 1) demonstrating strong effects of  
158 temporal resource overlap on the diet breadth of short- but not long-lived pollinators. Fig. 2 shows the  
159 results of one network as an illustration of how resource overlap explains large portions of the variation in  
160 diet breadth of pollinators with shorter flight periods (Fig. 2a, c), but little for the diet breadth of  
161 pollinators with longer flight periods (Fig. 2b, d). The transition from high explanatory power to low  
162 explanatory power is apparent as pollinator flight period increases regardless if specialization was  
163 measured at the end of simulations or averaged across the last 1000 model time steps (Fig 3). This result  
164 is also consistent across varying proportional lengths of time between pollinator flight periods using  
165 either the DFG or CV metric across all networks tested (Fig S8-Fig S10). As predicted, low levels of  
166 resource overlap drive pollinators with short flight periods to specialize because potential resource  
167 options are limited at any given moment in time. As temporal resource overlap increases, potential  
168 options increase resulting in a more generalized diet breadth (Fig. 2a, c). Long-lived bees, on the other  
169 hand, do not experience the same limitation of potential diet options due to temporal resource overlap,  
170 because they are active most of the entire flowering season and can potentially access most or all of the  
171 flowering plants. Results were consistent regardless of whether resource overlap was measured as total  
172 resource overlap (TRO) or average resource overlap (ARO).

## 173 **Pollen data results**

174 Our empirical results support our hypothesis, showing more specialized diets of short-lived bees  
175 in more seasonal environments (Michigan) with lower flowering overlap, than in less seasonal  
176 environments (UK) with higher flowering overlap. Our pollen data from Michigan presents more single  
177 family specialists than the less seasonal UK dataset (Fig S11). Dietary specialization between bee genera  
178 and regions varied significantly at both the level of botanical family ( $\chi^2=27.1$ ,  $p<0.001$ , Fig 4a) and genus  
179 ( $\chi^2=25.3$ ,  $p<0.001$ , Fig 4b). In accordance with our hypothesis, there was an effect of region at the

180 botanical family level, but only for the short-lived *Andrena* where species in Michigan were significantly  
181 more specialized than their British counterparts. In contrast, there were no differences for long-lived  
182 *Lasioglossum*. At the botanical genus level, the same trend was more strongly expressed, with *Andrena* in  
183 the UK showing a more generalized diet than their Michigan counterparts, but with no differences from  
184 *Lasioglossum* in either Michigan or the UK. Results were consistent when analyzed using the DFG metric  
185 (Fig S12).

186

## 187 **Discussion**

188 Our model results mechanistically demonstrate how differing phenologies interact with varying  
189 degrees of temporal resource overlap to alter pollinator diet breadth. These results are corroborated  
190 through our regional pollen load data which also presents the first empirical validation of benchmark  
191 theories on adaptive foraging by consumers in general<sup>7</sup> and pollinators in particular<sup>8</sup>. Furthermore, our  
192 results suggest broader implications regarding the drivers of bee diet breadth and diversification.

193 Global patterns of herbivory, particularly in insects, show strong trends of specialization at the  
194 botanical family level<sup>13</sup>. These patterns have been linked to phytochemical diversity<sup>19,22,23</sup> which  
195 consequently drives an increase of both dietary specialization and species diversification in many  
196 herbivorous insect groups across a latitudinal gradient towards the tropics, most clearly seen and well-  
197 studied in Lepidoptera<sup>22,24</sup>. However, bees break sharply from this pattern, with a relatively low diversity  
198 in the tropics when compared to Mediterranean and xeric environments<sup>8,25,26</sup>. Tropical environments are  
199 dominated by highly generalized, often social species that visit a huge variety of botanical families<sup>27,28</sup>.  
200 Tropical areas have the highest levels of global phytochemical diversity, but their flowering patterns have  
201 wider phenological variation than temperate areas at both the inter- and intraspecific levels. This results in  
202 tropical floral communities that *de facto* show higher resource overlap in any particular year<sup>29,30</sup> than  
203 temperate communities. Our theoretical and empirical results suggest that bees' strong departure from the  
204 typical global pattern in herbivory<sup>13</sup> may be due to a relatively stronger effect of phenology on their diet  
205 breadth than the phytochemical restrictions suggested for other insect herbivores. In fact, tropical bees

206 have not evolved anything approaching the same high degree of dietary specialization as seen in the  
207 tropical Lepidoptera despite existing in the same extremely phytochemically diverse landscapes. For  
208 further discussion of this point, see Supplementary Discussion.

209 Our modeling developments present a flexible operational basis going forward. Integration of  
210 time dependent functional components into species behavior and traits show that even high dimensional  
211 network models can be further expanded in tractable ways to include the dynamics of organismal  
212 phenology. Additionally, our metrics for diet breadth complement each other (see Supplementary  
213 Methods) and reflect past methods (Fig S10). These metrics also integrated well with empirical pollen  
214 load data sets that can be used to vet theoretical predictions. By expanding pollen datasets globally and  
215 incorporating empirically vetted plant-pollinator phenology, future research can address how foraging  
216 competition occurs across overlapping phenologies and what effects changing climatic conditions can  
217 have on network stability.

218  
219 **Conflict of interest statement:** We declare no conflict of interest.

220  
221 **Acknowledgements:** Part of this project was supported by the National Science Foundation grant DEB-  
222 1834497 awarded to F.S.V.

223  
224 **Author Contributions:** F.S.V. conceived the project. T.J.W., P.G., F.S.V., and J.R.M. developed the  
225 conceptual basis for the project. T.J.W. identified suitable collection sites and bee genera for the empirical  
226 study design, collected bee and pollen data, and identified specimens. P.G. and F.S.V. developed dynamic  
227 model, simulation design, code, and diet breadth metrics. P.G. implemented simulations and analyses.  
228 T.J.W. and P.G. wrote the first draft, and all authors edited and revised the manuscript.

229  
230 **Supplementary Information:** Supplementary Methods, Supplementary Discussion, Supplementary  
231 Figures and Tables.

232  
233 **Data Availability:** Pollen load data is available as Supplementary Table S9.

234  
235 **Code Availability:** Simulation code and simulation data are available at the repository:  
236 <https://github.com/fsvaldovinos/Phenology>. Phenology parameters used in the simulation portion of our  
237 study are available in Table S10.

238  
239 **References**

- 240 1. Kartzinel, T.R. et al. DNA metabarcoding illuminates dietary niche partitioning by African large  
241 herbivores. *PNAS* **112**(26), 8019-8024 (2015).  
242 2. Bommarco, R., Biesmeijer, J.C., Meyer, B., Potts, S.G., Pöyry, J., Roberts, S.P., Steffan-  
243 Dewenter, I. & Öckinger, E. Dispersal capacity and diet breadth modify the response of wild bees  
244 to habitat loss. *Proc. Roy. Soc. B* **277**(1690), 2075-2082 (2010).



- 245 3. Svanbäck, R. & Bolnik, D.I. Intraspecific competition drives increased resource use diversity  
246 within a natural population. *Proc. Roy. Soc. B* **274(1161)**, 839-844 (2007).
- 247 4. Wood, T.J. et al. Narrow pollen diets are associated with declining Midwestern bumble bee  
248 species. *Ecology* **100(6)** e02697 (2019).
- 249 5. Thompson, J. Rapid evolution as an ecological process. *TREE* **13(8)**, 329-332 (1998).
- 250 6. Biesmeijer, J.C., Roberts, S.P., Reemer, M., Ohlemüller, R., Edwards, M., Peeters, T., Schaffers,  
251 A.P., Potts, S.G., Kleukers, R., Thomas, C.D. & Settele, J. Parallel declines in pollinators and  
252 insect-pollinated plants in Britain and the Netherlands. *Science* **313(5785)**, 351-354 (2006).
- 253 7. MacArthur, R.H. & Pianka, E.R. On optimal use of a patchy environment. *The American*  
254 *Naturalist* **100(916)**, 603-609 (1966).
- 255 8. Waser, N.M., Chittka, L., Price, M.V., Williams, N.M. & Ollerton, J. Generalization in  
256 pollination systems, and why it matters. *Ecology* **77(4)**, 1043-1060 (1996).
- 257 9. Valdovinos, F.S., Moisset de Espanés, P., Flores, J.D. & Ramos-Jiliberto, R. Adaptive foraging  
258 allows the maintenance of biodiversity of pollination networks. *Oikos* **122(6)**, 907-917 (2013).
- 259 10. Valdovinos, F.S., Brosi, B.J., Briggs, H.M., Moisset de Espanés, P., Ramos-Jiliberto, R. &  
260 Martinez, N.D. Niche partitioning due to adaptive foraging reverses effects of nestedness and  
261 connectance on pollination network stability. *Ecology Letters* **19**, 1277-1286 (2016).
- 262 11. Boyle, W.A., Conway, C.J. & Bronstein, J.L. Why do some, but not all, tropical birds migrate? A  
263 comparative study of diet breadth and fruit preference. *Evolutionary Ecology* **25(1)**, 219-236  
264 (2011).
- 265 12. deVries, M.S. The role of feeding morphology and competition in governing the diet breadth of  
266 sympatric stomatopod crustaceans. *Biology Letters* **13(4)**, 20170055 (2017).
- 267 13. Forister, M.L., Novotny, V., Panorska, A.K., Baje, L., Basset, Y., Butterill, P.T., Cizek, L.,  
268 Coley, P.D., Dem, F., Diniz, I.R. and Drozd, P. The global distribution of diet breadth in insect  
269 herbivores *PNAS* **112(2)**, 442-447 (2015).
- 270 14. Bronstein, J.L. Our current understanding of mutualism. *The Quarterly Review of Biology* **69(1)**,  
271 31-51 (1994).
- 272 15. Westerkamp, C. Pollen in bee-flower relations. Some considerations on melittophily. *Bot. Acta.*  
273 **109**, 325-332 (1996).
- 274 16. Garibaldi, L.A., Steffan-Dewenter, I., Winfree, R., Aizen, M.A., Bommarco, R., Cunningham,  
275 S.A., Kremen, C., Carvalheiro, L.G., Harder, L.D., Afik, O. & Bartomeus, I. Wild pollinators  
276 enhance fruit set of crops regardless of honey bee abundance. *Science* **339**, 1608-1611 (2013).
- 277 17. Burkle, L. A., Marlin, J. C., & Knight, T. M. Plant-pollinator interactions over 120 years: loss of  
278 species, co-occurrence, and function. *Science* **339** (6127), 1611-1615 (2013).
- 279 18. Ali, J.G. & Agrawal, A.A. Specialist versus generalist insect herbivores and plant defense. *Trends*  
280 *in Plant Science* **17(5)**, 293-302 (2012).
- 281 19. Hunter, M. *The Phytochemical Landscape: Linking Trophic Interactions and Nutrient Dynamics.*  
282 Princeton University Press, 376 pp (2016).
- 283 20. Beck, H., Zimmermann, N., McVicar, T. et al. Present and future Köppen-Geiger climate  
284 classification maps at 1-km resolution. *Sci Data* **5**, 180214 <https://doi.org/10.1038/sdata.2018.214>  
285 (2018).
- 286 21. Baude, M., Kunin, W.E., Boatman, N.D., Conyers, S., Davies, N., Gillespie, M.A., Morton, R.D.,  
287 Smart, S.M. & Memmott, J. Historical nectar assessment reveals the fall and rise of floral  
288 resources in Britain. *Nature* **530**, 85-88 (2016).
- 289 22. Becerra, J. On the factors that promote the diversity of herbivorous insects and plants in tropical  
290 forests. *PNAS* **112(19)**, 6098-6103 (2015).
- 291 23. Richards, L.A., Dyer, L.A., Forister, M.L., Smilanich, A.M., Dodson, C.D., Leonard, M.D. &  
292 Jeffrey, C.S. Phytochemical diversity drives plant-insect community diversity. *PNAS* **112(35)**,  
293 10973-10978 (2015).

- 294 24. Dyer, L.A., Singer, M.S., Lill, J.T., Stireman, J.O., Gentry, G.L., Marquis, R.J., Ricklefs, R.E.,  
295 Greeney, H.F., Wagner, D.L., Morais, H.C. & Diniz, I.R. Host specificity of Lepidoptera in  
296 tropical and temperate forests. *Nature* **448(7154)**, 696-699 (2007).  
297 25. Heithaus, E.R. Community structure of neotropical flower visiting bees and wasps: diversity and  
298 phenology. *Ecology* **60(1)**, 190-202 (1979).  
299 26. Moldenke, A.R. The role of host-plant selection in bee speciation processes. *Phytologia*, **43**, 433-  
300 460 (1979).  
301 27. Eltz, T., Brühl, C.A., van der Kaars, S., Chey, V.K. & Linsenmair, K.E. Pollen foraging and  
302 resource partitioning of stingless bees in relation to flowering dynamics in a Southeast Asian  
303 tropical rainforest. *Insectes sociaux* **48**, 273-279 (2001).  
304 28. Galgani-Barraza, P., Moreno, J.E., Lobo, S., Tribaldos, W., Roubik, D.W. & Weislo, W.T.  
305 Flower use by late nineteenth-century orchid bees (*Eufriesea surinamensis*, Hymenoptera,  
306 Apidae) nesting in the Catedral Basílica Santa María la Antigua de Panamá. *Journal of*  
307 *Hymenoptera Research* **74**, 65-81 (2019).  
308 29. Newstrom, L.E., Frankie, G.W. & Baker, H.G. A new classification for plant phenology based on  
309 flowering patterns in lowland tropical rain forest trees at La Selva, Costa Rica. *Biotropica* **26**,  
310 141-159 (1994).  
311 30. Stevenson, P.R., Castellanos, M.C., Cortés, A.I. & Link, A. Flowering patterns in a seasonal  
312 tropical lowland forest in western Amazonia. *Biotropica* **40**, 559-567 (2008).  
313  
314  
315  
316  
317  
318  
319  
320  
321  
322  
323  
324  
325  
326  
327  
328  
329  
330  
331  
332  
333  
334  
335  
336  
337  
338  
339  
340  
341  
342  
343  
344

345 **Figures & Figure Legends**  
346

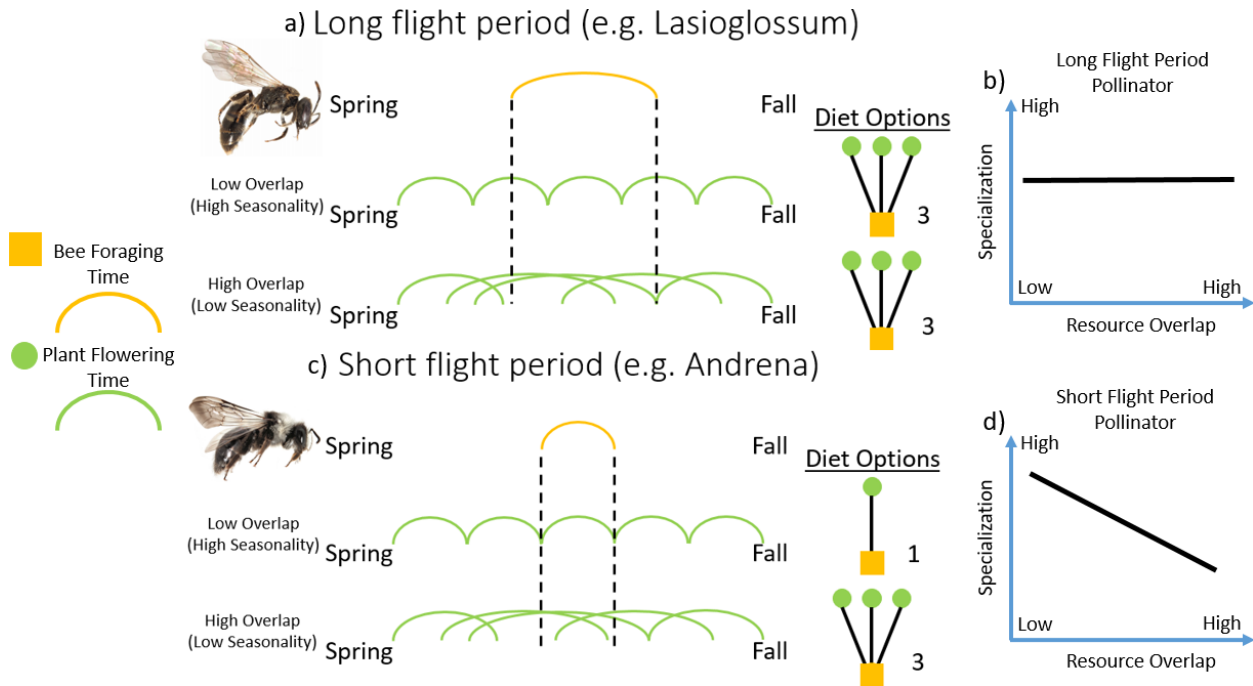

347  
348  
349  
350  
351  
352  
353  
354  
355  
356  
357  
358  
359  
360

**Figure 1: Graphical diagram of our hypothesis.** Our hypothesis stems from the temporal overlap of flowering resources available to pollinators. Highly seasonal delimitations between different flowering populations create low levels of temporal overlap amongst different flowering resources. On the other hand, fewer seasonal delimitations between different flowering populations create higher levels of temporal overlap amongst different flowering resources. a) In long flight-period pollinators (e.g. *Lasioglossum*), differing levels of temporal resource overlap have limited to no effect on the degree of diet options available to the pollinator. b) This is predicted to lead to a non-significant relationship between overlap and specialization in long flight period pollinators. c) In short flight-period pollinators (e.g. *Andrena*), low and high temporal resource overlap can limit or expand pollinator diet options respectively. d) This is predicted to lead to a significant relationship between overlap and specialization in short flight-period pollinators.

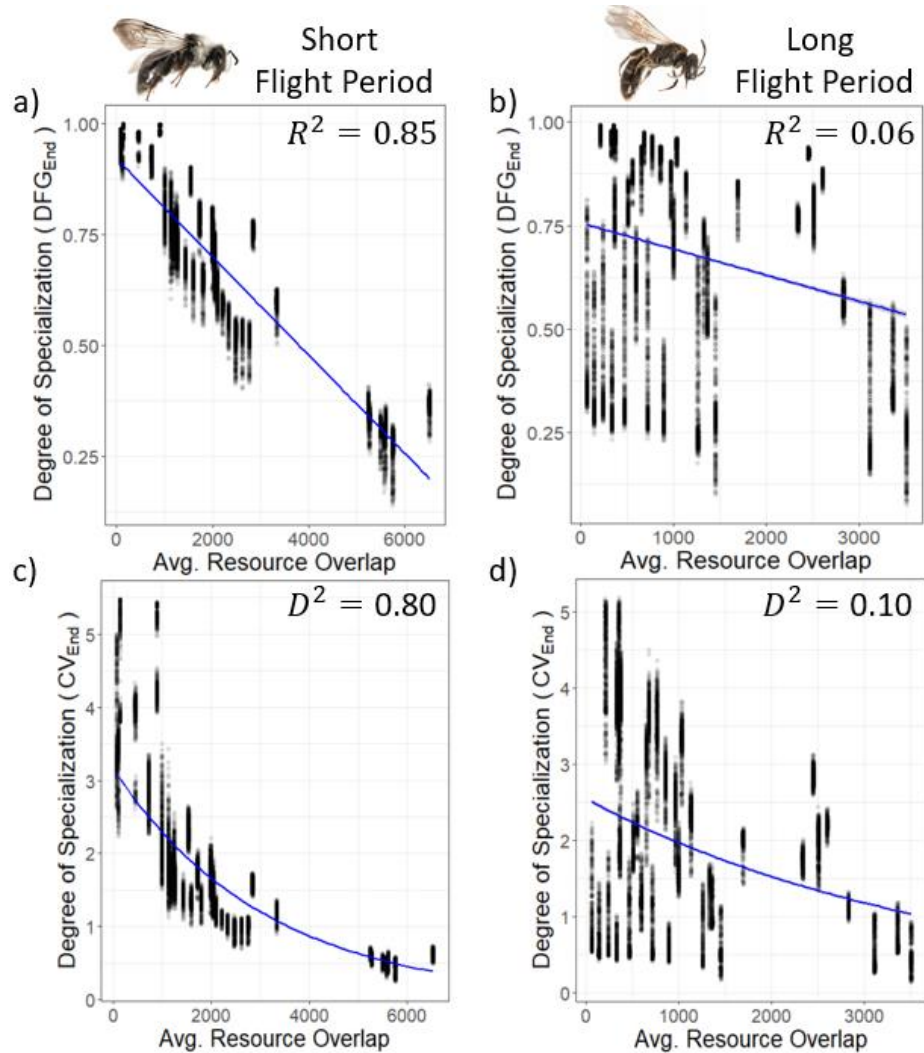

361  
362

363 **Figure 2: Temporal resource overlap drives specialization more strongly in short-lived than in long-**  
364 **lived pollinators.** Model output on pollinator specialization taken across average plant overlap (ARO) for  
365 short flight period (flight period = 20 time steps) and long flight period pollinators (flight period = 300  
366 time steps). Each dot represents the diet breadth metric of a single pollinator population based on their  
367 foraging effort per plant species. Diet breadth was measured at the end of simulations using **a)** DFG in a  
368 short flight period bee, F-statistic: 1.05e+05 on 1 and 18498 DF, p-value: < 2.2e-16, **b)** DFG in a long  
369 flight period bee, F-statistic: 1089 on 1 and 18498 DF, p-value: < 2.2e-16, **c)** CV in a short flight period  
370 bee, Residual deviance: 671.94 on 18498 degrees of freedom, **d)** CV in a long flight period bee, Residual  
371 deviance: 8244.4 on 18498 degrees of freedom. Example data taken from a network framework with 30  
372 plant and 50 pollinator species. Higher values of both DFG and CV metrics indicate higher levels of  
373 specialization (narrower diet breadth) while lower values indicate a more generalized feeding range  
374 (wider diet breadth).  
375

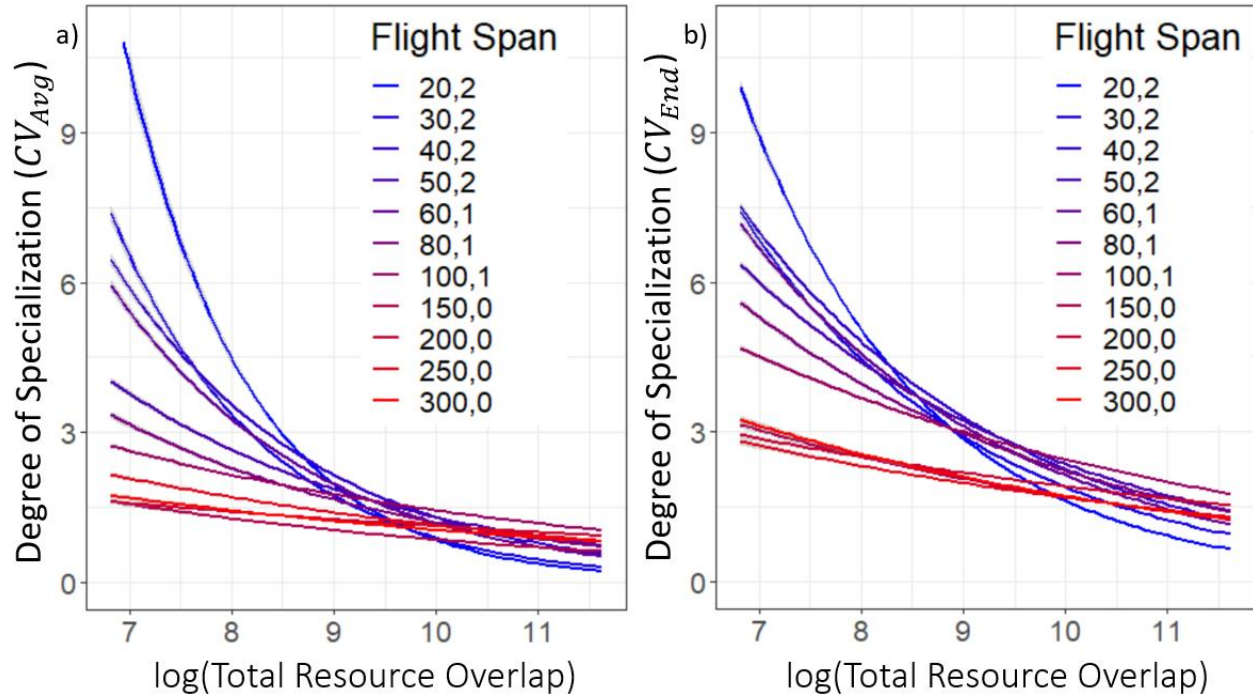

376

377

378

379

380

381

382

383

384

385

386

387

388

**Figure 3: Interactive effect of temporal resource overlap and pollinator flight period on pollinator diet breadth.** Representative sample of generalized linear models (Gamma distribution with log link functions) showing change in effect of Total Resource Overlap (TRO) on pollinator diet breadth in model simulations. Flight period labels indicate the length of the flight period and the number of phenology cycles between subsequent flight periods (see Supplementary Methods). Diet breadth shown as the degree of specialization measured by the CV of pollinator foraging effort per plant species taken **a**) at the end of simulations and **b**) averaged across the last 1000 time steps. Higher CV values correspond with a higher level of specialization (narrower diet breadth) while lower CV values indicate a more generalized feeding range (wider diet breadth). Example data taken from a network framework with 30 plant and 50 pollinator species.

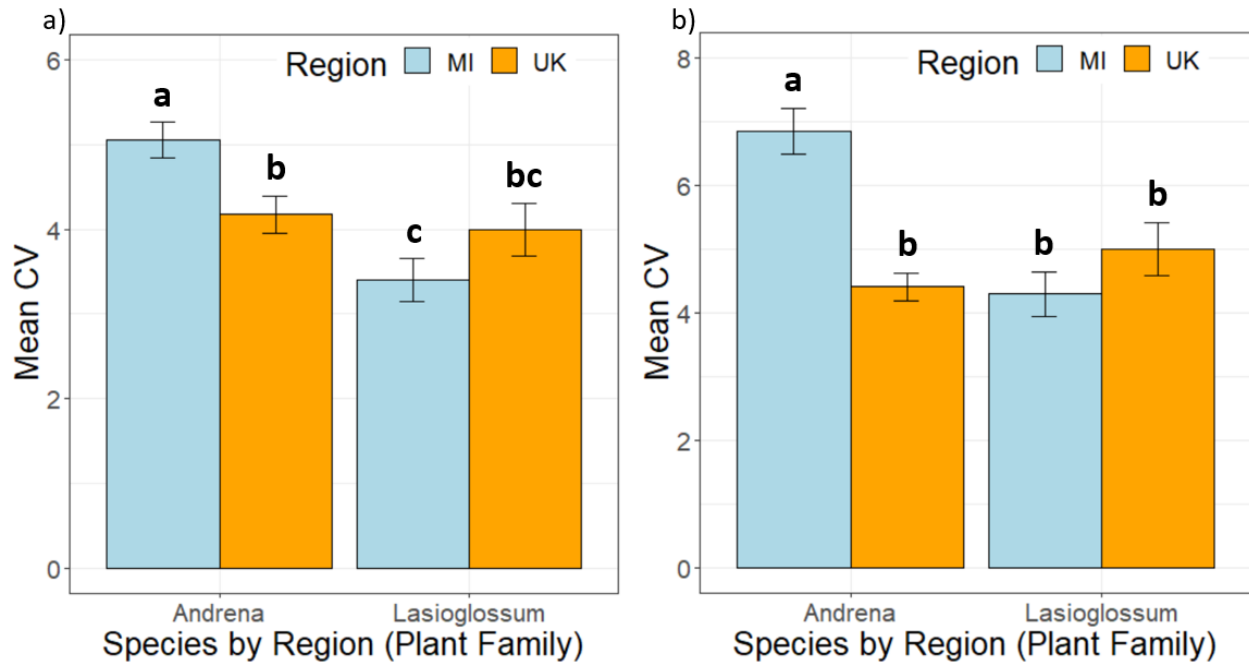

389  
390  
391  
392  
393  
394  
395  
396  
397  
398

**Figure 4: Empirical measures of dietary specialization.** Short-lived *Andrena* bees show higher levels of specialization in highly seasonal (Michigan) compared to the weakly seasonal (UK), with no differences for long-lived *Lasioglossum* bees using the CV metric. Moreover, only in Michigan is there a difference in specialization between the two bee genera, showing a minimal impact of flight period in weakly seasonal environments. Effects are consistent at both the (a) botanical family and (b) botanical genus level. Bars headed by different letters are significantly different ( $p < 0.05$ ). Error bars show standard error.
